# Supplementary Material

## Global-scale structure of the eelgrass microbiome

Ashkaan K Fahimipour<sup>1,\*</sup>, Melissa R Kardish<sup>2</sup>, Jonathan A Eisen<sup>2,3,4</sup>, Jenna M Lang<sup>3</sup>, Jessica L Green<sup>1,5</sup>, and John J Stachowicz<sup>2</sup>

<sup>1</sup>Institute of Ecology and Evolution, University of Oregon, Eugene, OR

<sup>2</sup>Dept. of Evolution and Ecology, University of California, Davis, CA

<sup>3</sup>Genome Center, University of California, Davis, CA

<sup>4</sup>Medical Microbiology and Immunology, University of California, Davis, CA

<sup>5</sup>Santa Fe Institute, Santa Fe, NM

# Supplementary Figure

Figure S1

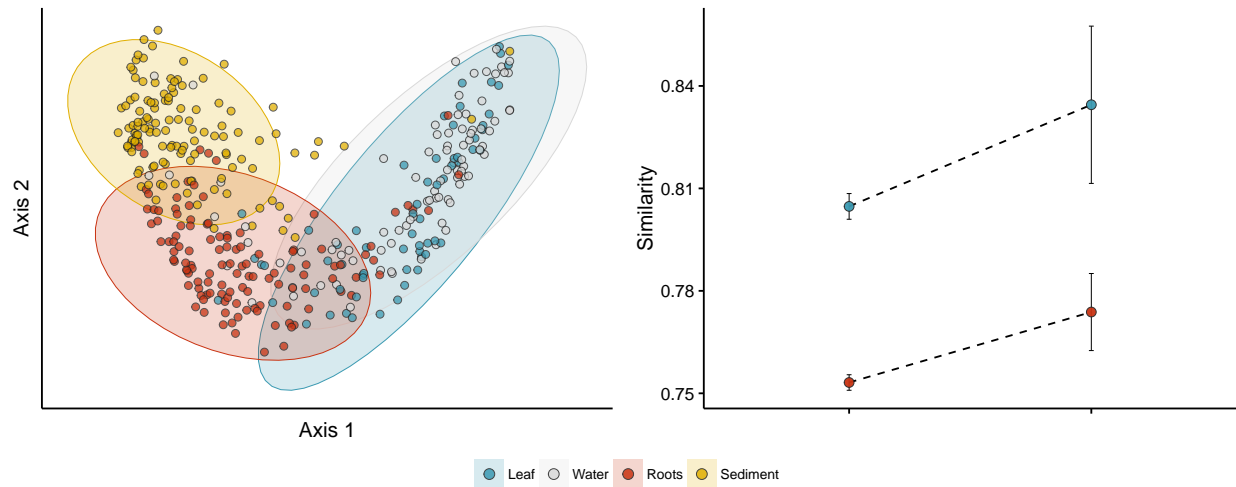

**Fig. S1.** Results of  $\beta$ -diversity analysis of unweighted UniFrac distances (Lozupone and Knight, 2005) are qualitatively similar to those of Canberra distances (compare with Fig. 1 in *main text*). (Left panel) Ordination plots show results of a 2-dimensional PCoA. Colors are the same as in Fig. 1 in the *main text*. Ellipses represent group-specific 95% confidence intervals assuming a multivariate t-distribution. (Right panel) Comparisons of host-environment phylogenetic similarities within- versus between seagrass beds. Points represent mean similarities between leaves and water (blue points), and roots and sediment (red points)  $\pm$  SEM. Patterns in phylogenetic diversity within- versus between seagrass beds followed the same qualitative patterns as compositional diversities, but were statistically non-significant ( $P = 0.18$  for leaves;  $P = 0.19$  for roots). This suggests that eelgrass leaf and root microbiomes were only marginally more phylogenetically related to their adjacent environments compared to all others.

## References

Lozupone, C. and Knight, R. (2005). Unifrac: a new phylogenetic method for comparing microbial communities. *Applied and environmental microbiology*, 71(12):8228–8235.
